# Supplementary material for: Low temperature in situ immobilization of nanoscale fcc and hcp polymorphic nickel particles in polymer-derived Si–C–O–N(H) to promote electrocatalytic water oxidation in alkaline media
Source: Royal Society of Chemistry journal article supplement (doi:10.1039/d2na00821a), 2022-12-06
Supplement: d2na00821a1.pdf [file d2na00821a1.pdf]

## Supporting Information

### Low temperature *in situ* immobilization of nanoscale fcc and hcp polymorphic nickel particles in polymer-derived Si-C-O-N(H) to promote electrocatalytic water oxidation in alkaline media

Roberta Karoline Morais Ferreira<sup>a,b</sup>, Marwan Ben Miled<sup>a</sup>, Rafael Kenji Nishihora<sup>a,b</sup>, Nicolas Christophe<sup>a,c</sup>, Pierre Carles<sup>a</sup>, Günter Motz<sup>d</sup>, Assil Bouzid<sup>a</sup>, Ricardo Machado<sup>b</sup>, Olivier Masson<sup>a</sup>, Yuji Iwamoto<sup>e</sup>, Stéphane Célérier<sup>c</sup>, Aurélien Habrioux<sup>c,\*</sup>, Samuel Bernard<sup>a,\*</sup>

<sup>a</sup>Univ. Limoges, CNRS, IRCER, UMR 7315, F-87000, Limoges, France.

<sup>b</sup>Chemical Engineering, Federal University of Santa Catarina, 88010-970 Florianópolis, Brazil.

<sup>c</sup>Institut de Chimie des Milieux et Matériaux de Poitiers (IC2MP), Université de Poitiers, CNRS, F-86073 Poitiers, France.

<sup>d</sup>University of Bayreuth, Ceramic Materials Engineering (CME), Bayreuth, Germany

<sup>e</sup>Graduated School of Engineering, Department of Life Science and Applied Chemistry, Nagoya Institute of Technology, Gokiso-cho, Showa-ku, Nagoya, Aichi 466-8555 (Japan)

\*Corresponding authors: Aurélien Habrioux (E-mail: [aurelien.habrioux@univ-poitiers.fr](mailto:aurelien.habrioux@univ-poitiers.fr)); Samuel Bernard ([Samuel.bernard@unilim.fr](mailto:Samuel.bernard@unilim.fr))

## Supplementary figures

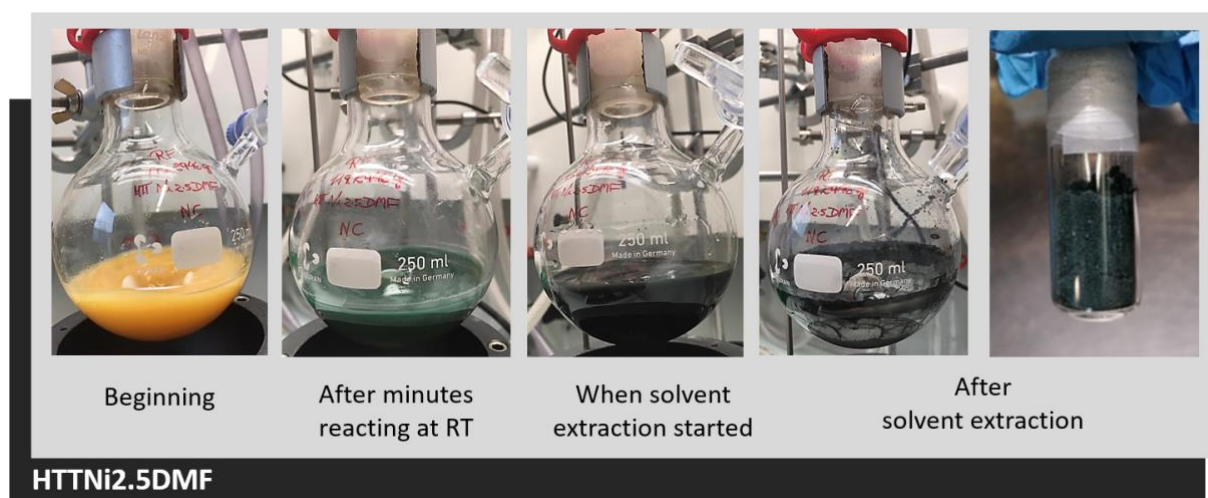

Fig. S1 Compilation of the different reaction steps to form the precursor labeled **PSZNi2.5**.

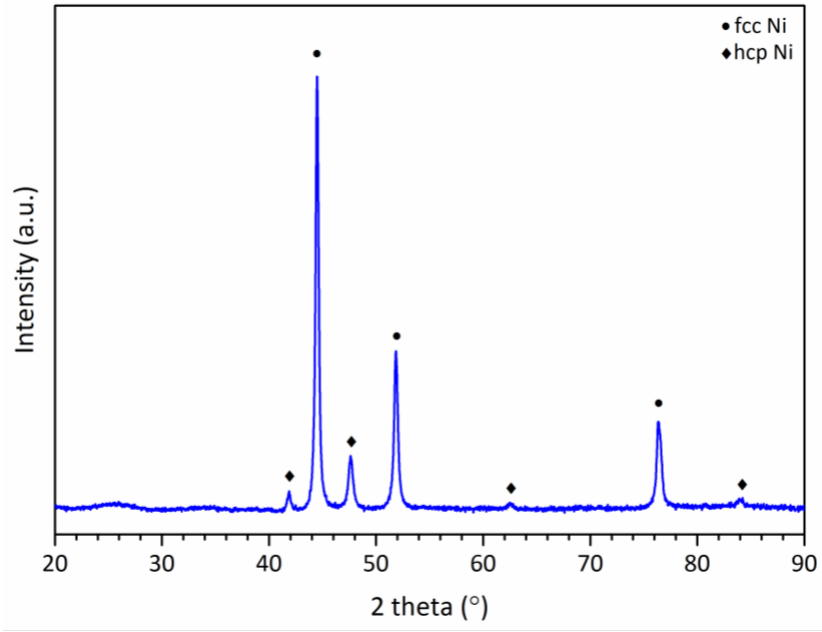

**Fig. S2.** XRD pattern of the **PSZNi2.5\_5** sample.

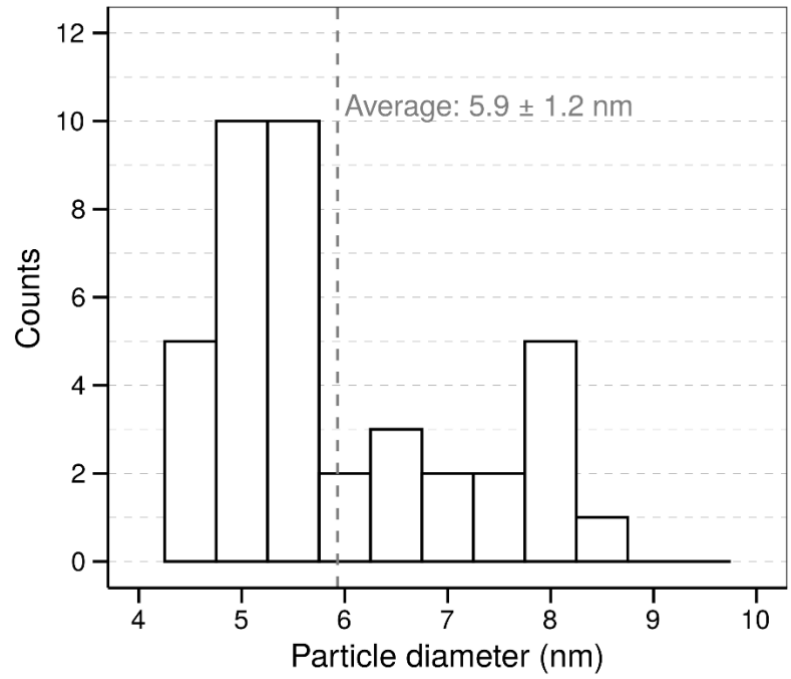

**Fig. S3.** Size distribution histogram of the smallest particles in Fig. 6c.

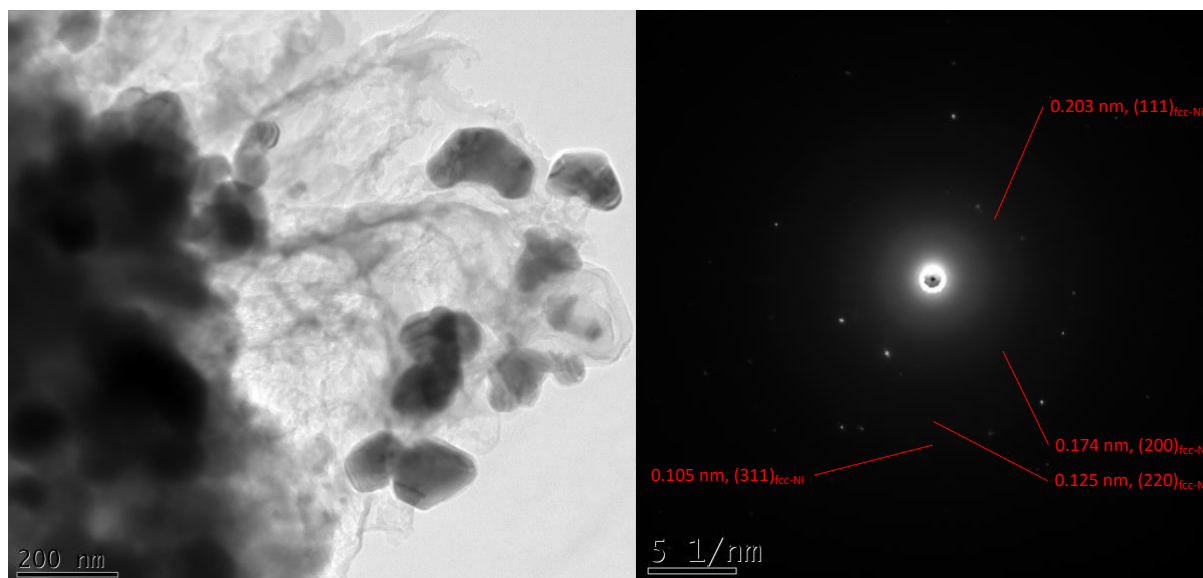

**Fig. S4** TEM micrograph of a population made of bigger particles isolated in the **PSZNi2.5\_5** sample and corresponding SAED pattern.

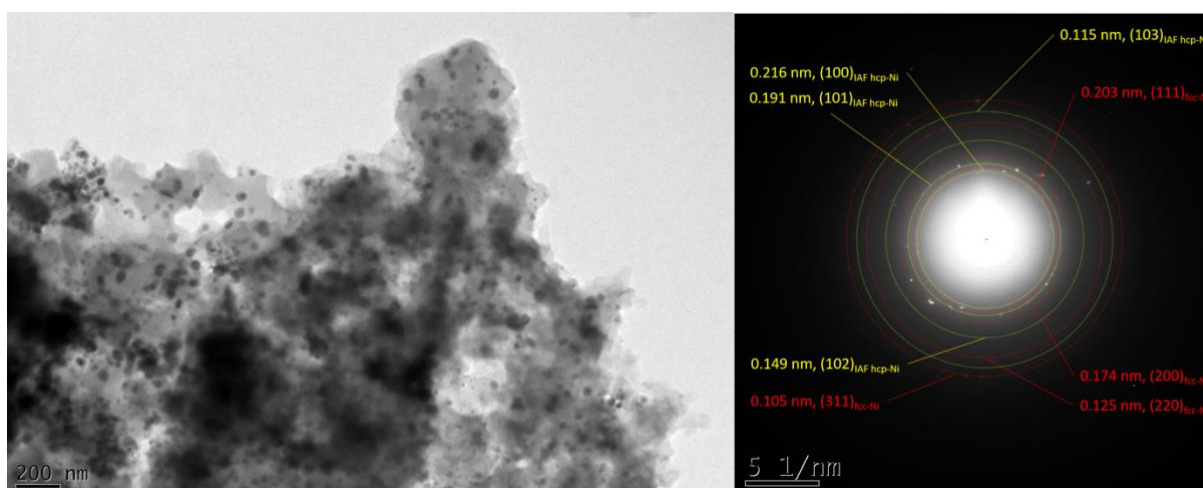

**Fig. S5** TEM micrograph and corresponding SAED pattern when introducing a smallest population size of nanoparticles in the **PSZNi2.5\_5** sample.

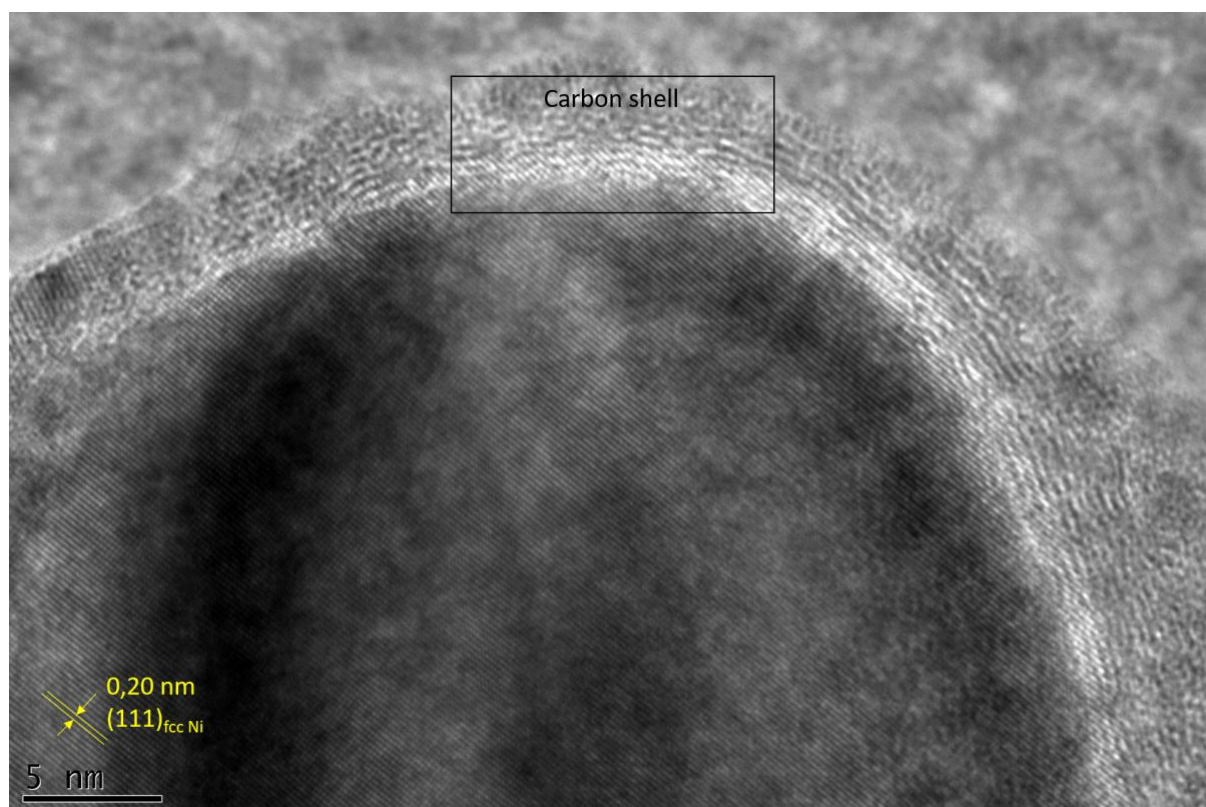

(a)

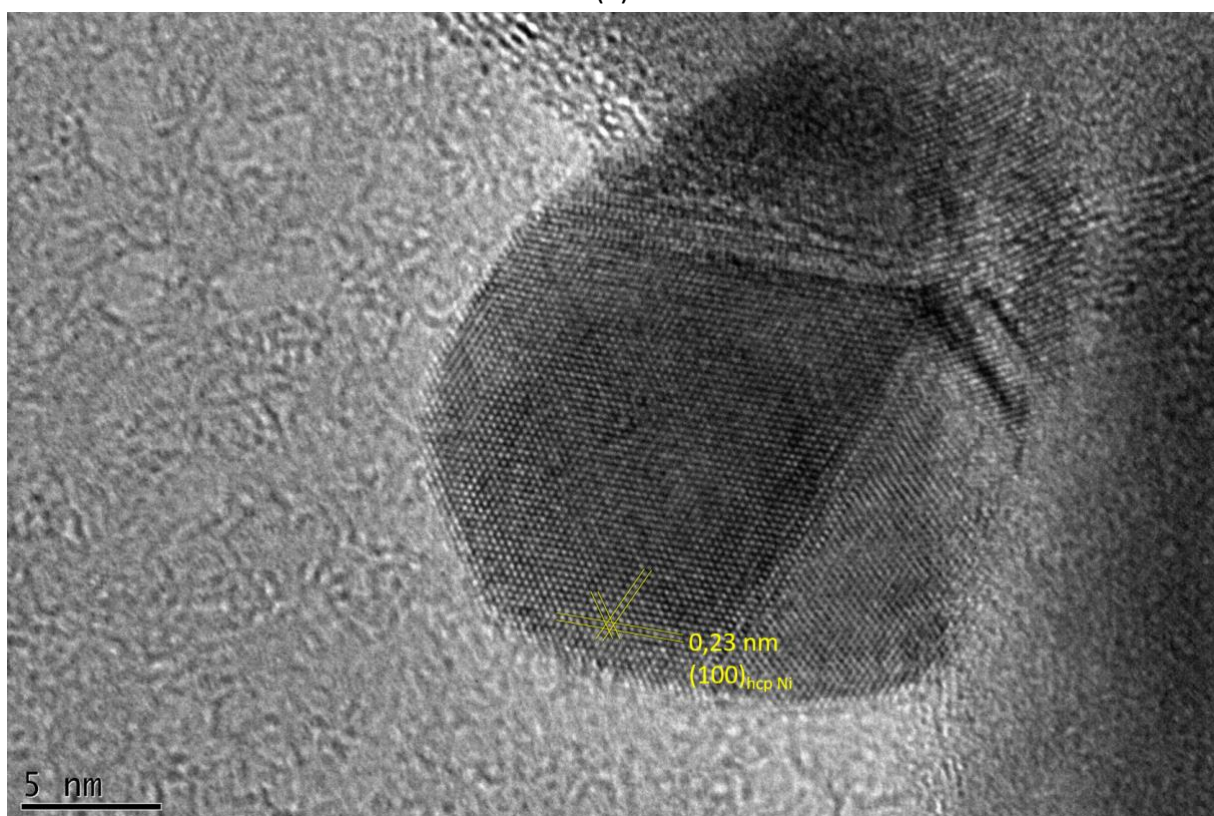

(b)

**Fig. S6.** Nanoparticles made of fcc Ni (core) surrounded by carbon layers (carbon shell) (a) and smallest nanoparticles made of hcp Ni (b).
